# Supplementary material for: The Trials and Tribulations of Structure Assisted Design of KCa Channel Activators
Source: PubMed Central journal article supplement (PMC6764326; doi:10.3389/fphar.2019.00972), 2019-09-20
Supplement: DataSheet_1.pdf [file DataSheet_1.pdf]

## Supplementary Fig.1

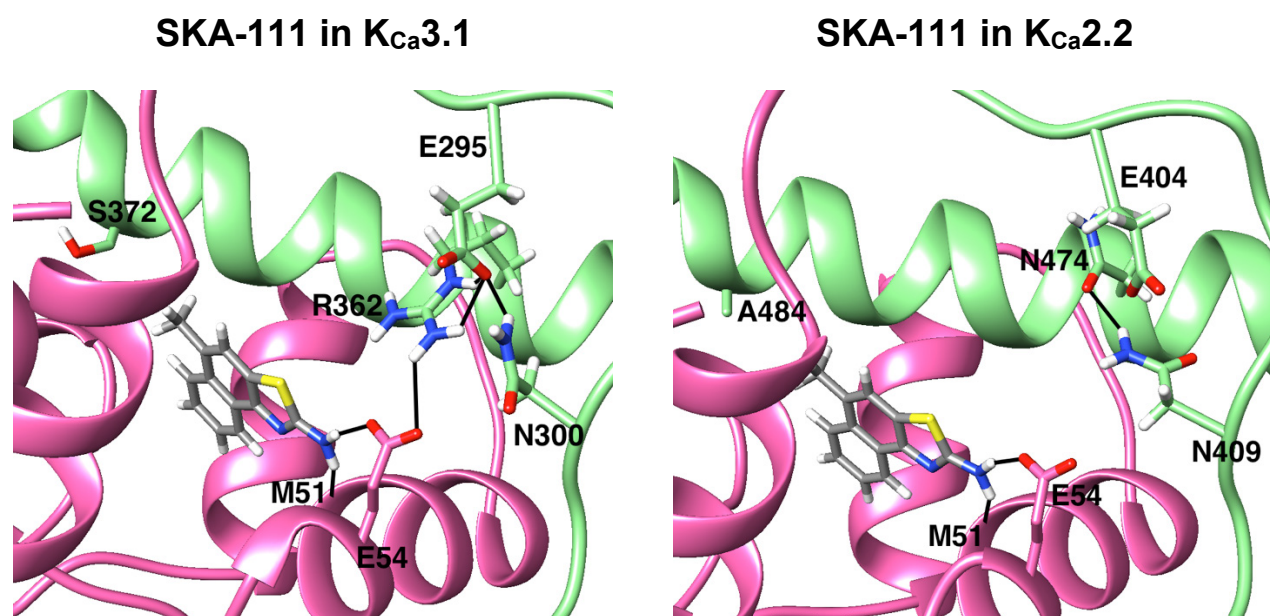

**Docking model of K<sub>Ca</sub>3.1 and K<sub>Ca</sub>2.2 CaM-BD/CaM complexes with SKA-111.** In the K<sub>Ca</sub>3.1 model the amino group of the benzothiazole ring system of SKA-111 forms hydrogen bonds with M51 and E54 in calmodulin. E54 is further stabilized by an extensive hydrogen bond network with R362, E295 and N300 in the K<sub>Ca</sub>3.1 channel model, which we hypothesized to be responsible for the 100-fold K<sub>Ca</sub>3.1 selectivity of SKA-111. In the K<sub>Ca</sub>2.2 model, however, SKA-111 forms only hydrogen bonds with M51 and E54. Due to the shorter length of the N474 side chain in K<sub>Ca</sub>2.2 E54 is not stabilized by additional hydrogen bonds. The CaM-BD is shown in light green; CaM is colored pink.

The eight 2-aminobenzothiazoles shown below, which all display some degree of selectivity for K<sub>Ca</sub>3.1 over K<sub>Ca</sub>2 channels, converged on similar binding poses as SKA-111 with an extensive hydrogen bond network centered around R362 in the K<sub>Ca</sub>3.1 model and hydrogen bonds between the -NH<sub>2</sub> group and M51 and E54 in CaM in both the K<sub>Ca</sub>3.1 and the K<sub>Ca</sub>2.2 model.

|        |        |        |        |        |         |         |         |
|--------|--------|--------|--------|--------|---------|---------|---------|
|        |        |        |        |        |         |         |         |
| SKA-31 | SKA-44 | SKA-45 | SKA-72 | SKA-73 | SKA-107 | SKA-117 | SKA-120 |

## Supplementary Fig.2

Chemical structures of the 168 virtually designed and docked compounds. Highlighted compounds were synthesized and tested.

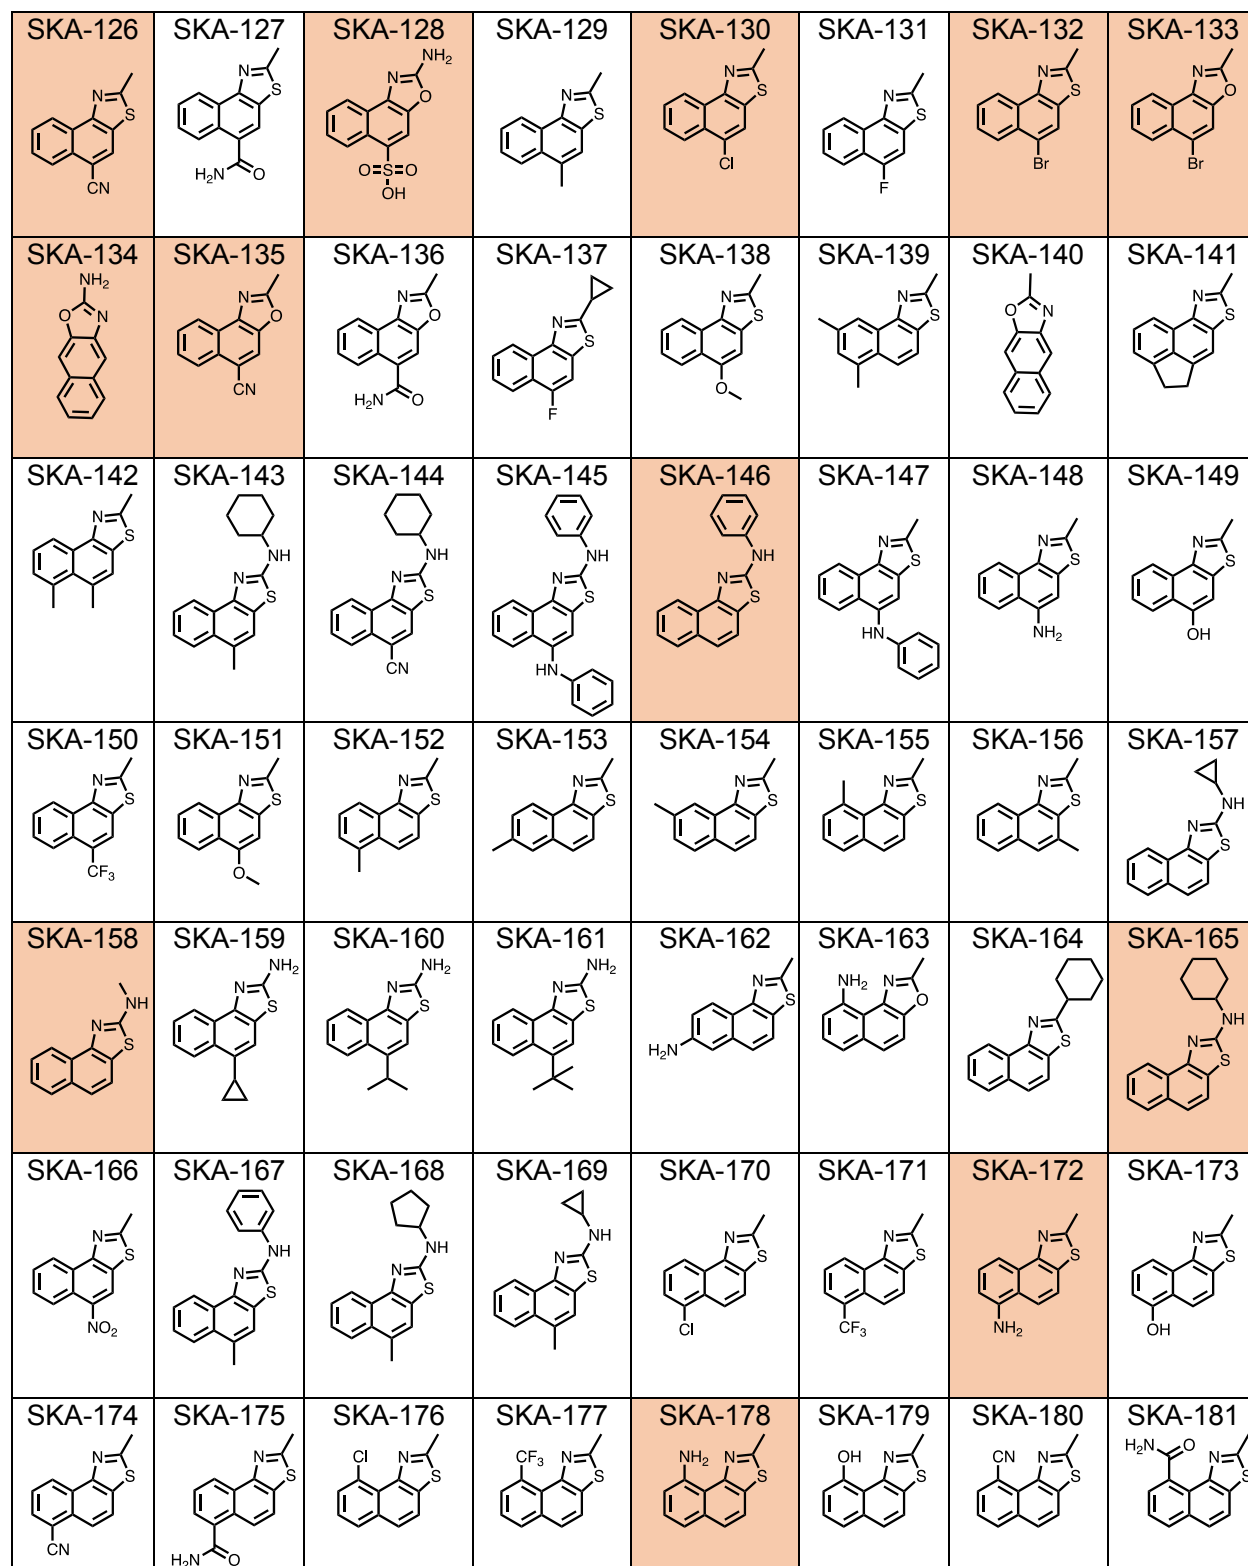

|             |             |             |             |             |             |             |             |
|-------------|-------------|-------------|-------------|-------------|-------------|-------------|-------------|
| SKA-182<br> | SKA-183<br> | SKA-184<br> | SKA-185<br> | SKA-186<br> | SKA-187<br> | SKA-188<br> | SKA-189<br> |
| SKA-190<br> | SKA-191<br> | SKA-192<br> | SKA-193<br> | SKA-194<br> | SKA-195<br> | SKA-196<br> | SKA-197<br> |
| SKA-198<br> | SKA-199<br> | SKA-200<br> | SKA-201<br> | SKA-202<br> | SKA-203<br> | SKA-204<br> | SKA-205<br> |
| SKA-206<br> | SKA-207<br> | SKA-208<br> | SKA-209<br> | SKA-210<br> | SKA-211<br> | SKA-212<br> | SKA-213<br> |
| SKA-214<br> | SKA-215<br> | SKA-216<br> | SKA-217<br> | SKA-218<br> | SKA-219<br> | SKA-220<br> | SKA-221<br> |
| SKA-222<br> | SKA-223<br> | SKA-224<br> | SKA-225<br> | SKA-226<br> | SKA-227<br> | SKA-228<br> | SKA-229<br> |
| SKA-230<br> | SKA-231<br> | SKA-232<br> | SKA-233<br> | SKA-234<br> | SKA-235<br> | SKA-236<br> | SKA-237<br> |

|             |             |             |             |             |             |             |             |
|-------------|-------------|-------------|-------------|-------------|-------------|-------------|-------------|
| SKA-238<br> | SKA-239<br> | SKA-240<br> | SKA-241<br> | SKA-242<br> | SKA-243<br> | SKA-244<br> | SKA-245<br> |
| SKA-246<br> | SKA-247<br> | SKA-248<br> | SKA-249<br> | SKA-250<br> | SKA-251<br> | SKA-252<br> | SKA-253<br> |
| SKA-254<br> | SKA-255<br> | SKA-256<br> | SKA-257<br> | SKA-258<br> | SKA-259<br> | SKA-260<br> | SKA-261<br> |
| SKA-262<br> | SKA-263<br> | SKA-264<br> | SKA-265<br> | SKA-266<br> | SKA-267<br> | SKA-268<br> | SKA-269<br> |
| SKA-270<br> | SKA-271<br> | SKA-272<br> | SKA-273<br> | SKA-274<br> | SKA-275<br> | SKA-276<br> | SKA-277<br> |
| SKA-278<br> | SKA-279<br> | SKA-280<br> | SKA-281<br> | SKA-282<br> | SKA-283<br> | SKA-284<br> | SKA-285<br> |

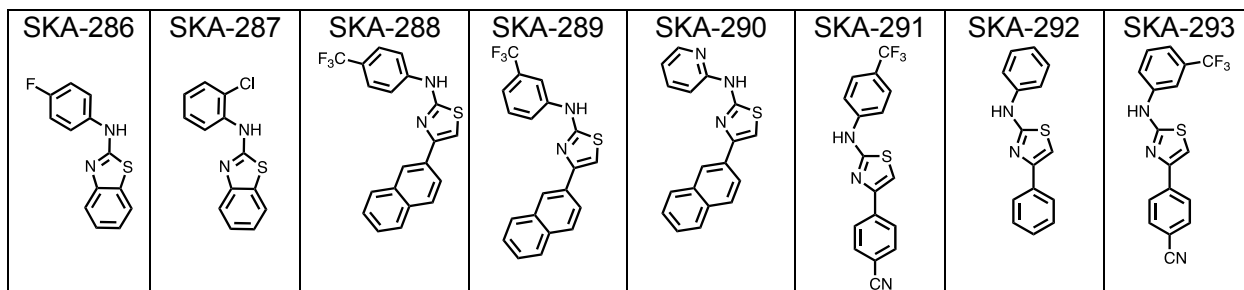

### Supplementary Fig.3

QPatch screening of activator compounds on  $K_{Ca3.1}$  and  $K_{Ca2.2}$  channels with 250 nM of free  $Ca^{2+}$  in the internal solution.

#### Screening of SKA-126 on $K_{Ca3.1}$

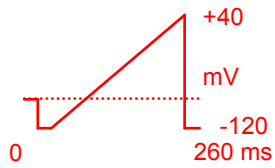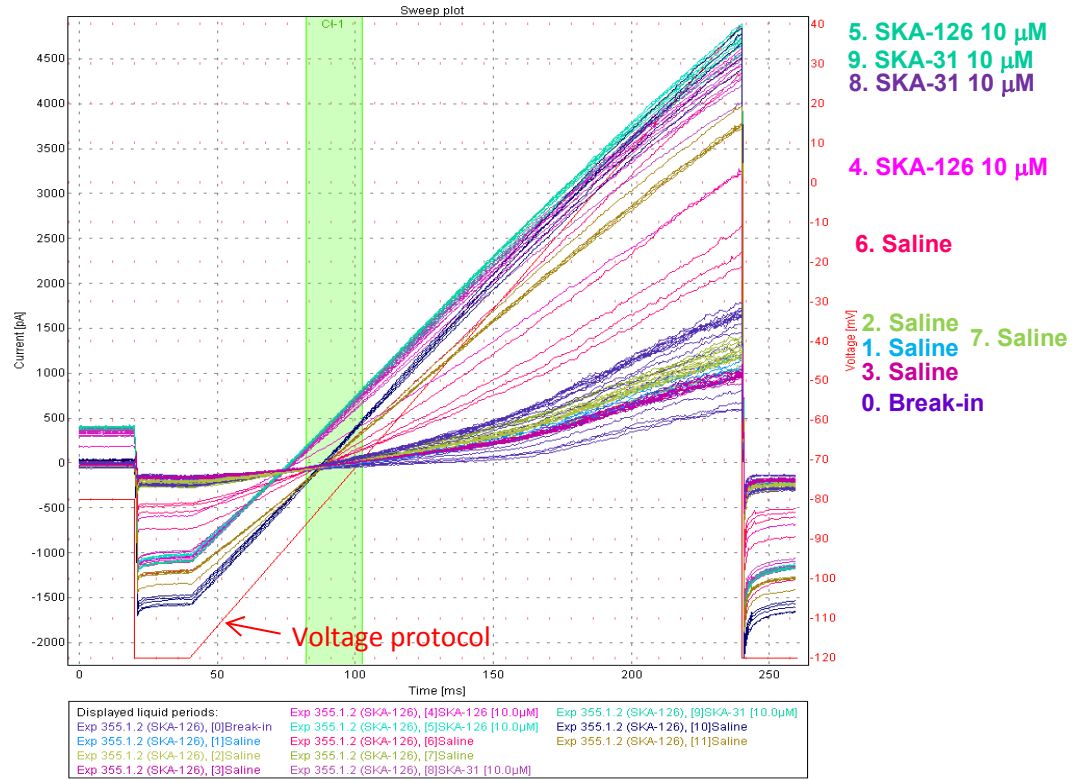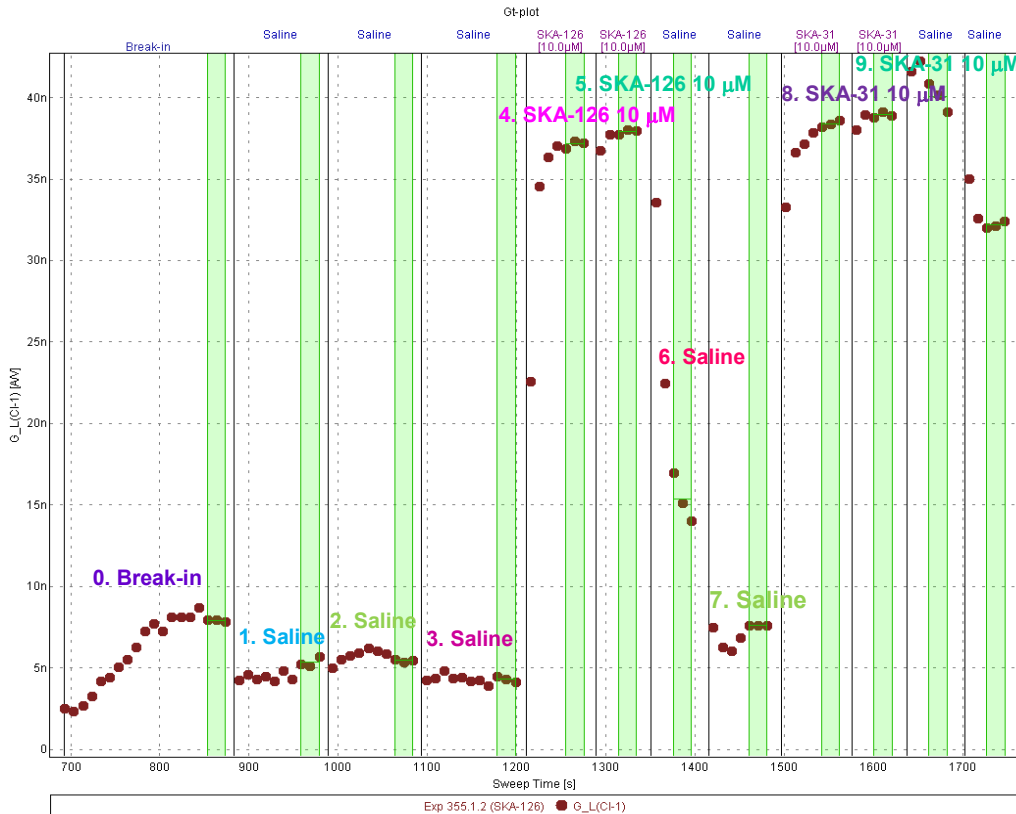

Raw current traces (top) and plot of current slope (measured between -85 and -65 mV) versus time for  $K_{Ca}$  activation (bottom). SKA-31 was used as the positive control. Saline or drugs were perfused during the first 15 sec of each so-called liquid period.

## Screening of SKA-126 on $K_{Ca2.2}$

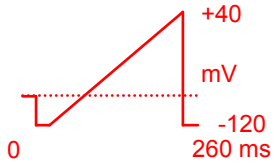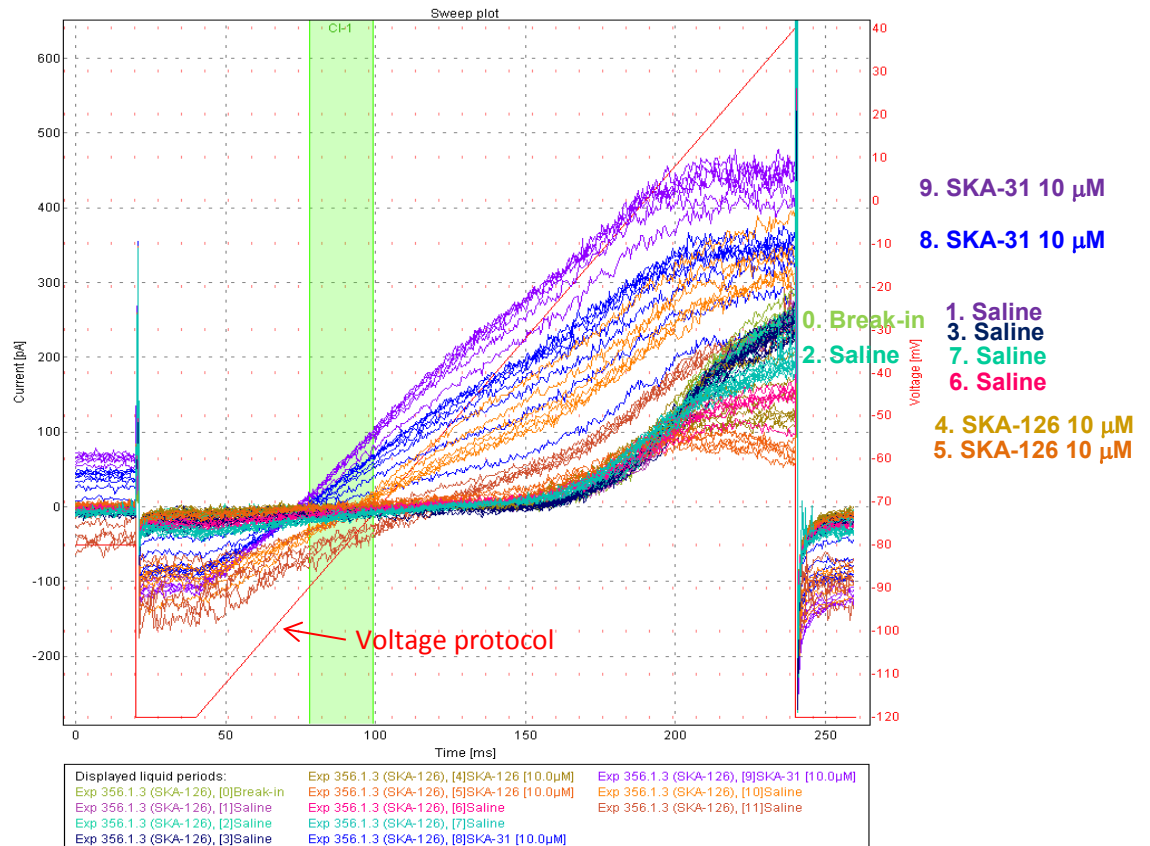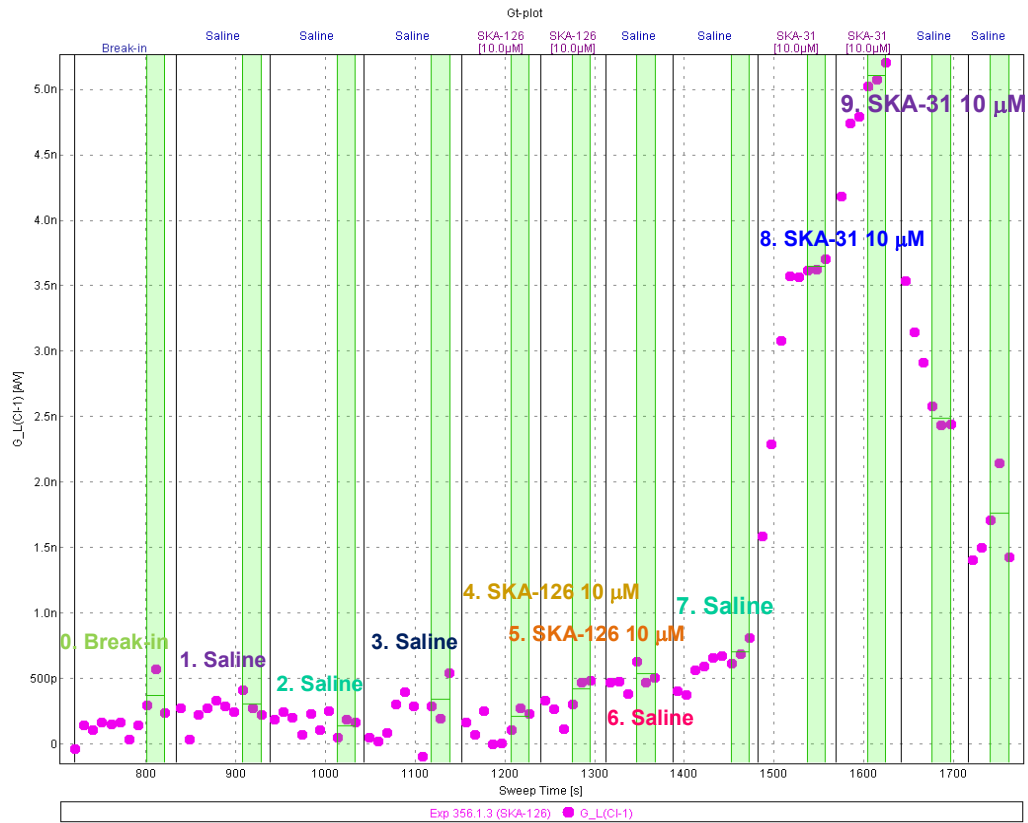

Raw current traces (top) and plot of current slope (measured between -85 and -65 mV) versus time for  $K_{Ca}$  activation (bottom). SKA-31 was used as the positive control.

**Note:**  $K_{Ca2.2}$  currents are smaller than  $K_{Ca3.1}$  currents and show some rectification at positive potentials.



## Supplementary Fig.4

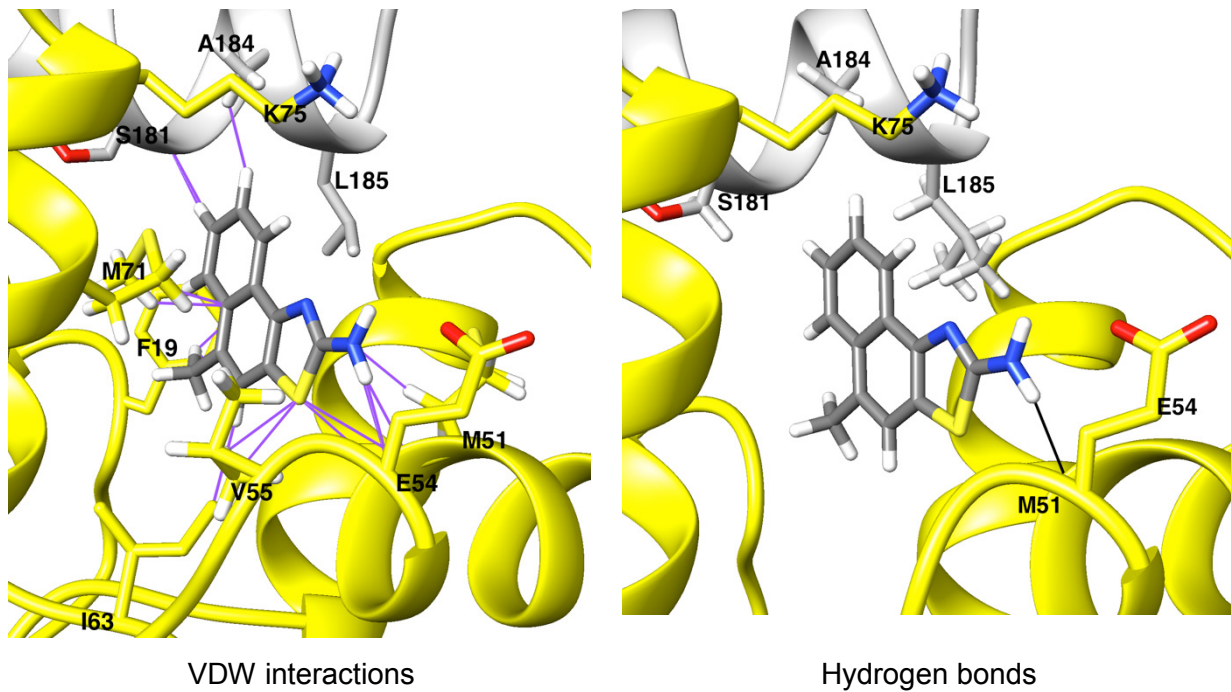

### SKA-111 in $K_{Ca}3.1$ open state 2 (pdb id: 6cno)

The channel is shown in gray and the CaM N-lobe in yellow. Hydrogen bonds are shown in black, van der Waals interactions are visualized in purple. SKA-111 forms one hydrogen bond with M51 (right) and makes 12 van der Waals contacts with residues in the  $S_{45}A$  helix and the CaM N-lobe (left).

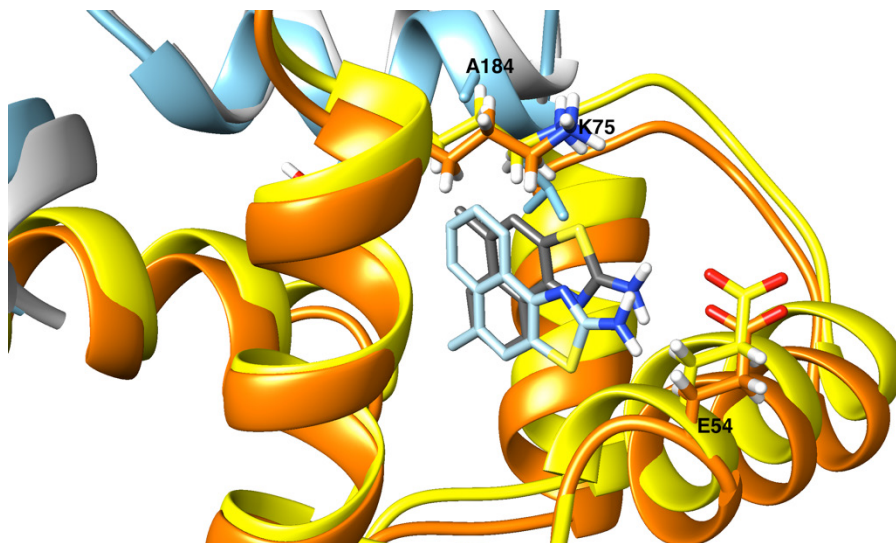

Overlay of the Rosetta docking models of SKA111 in open state 1 (yellow and light grey) and open state 2 (orange and sky blue). SKA-111 is shown in dark grey in open state 1 and in light blue in open state 2.



### Supplementary Fig.5

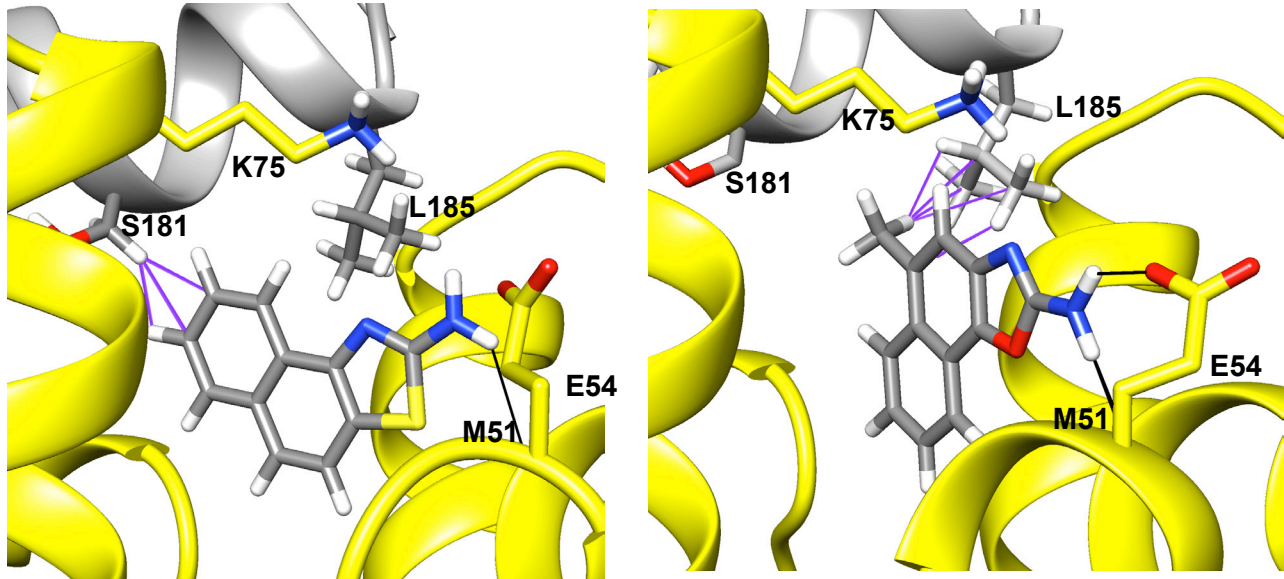

### SKA-31 (left) and SKA-121 (right) in KCa3.1 open state 1 (pdb id: 6cnn)

The channel is shown in gray and the CaM N-lobe in yellow. Hydrogen bonds are shown in black, van der Waals interactions are visualized in purple. For clarity, not all side chains of CaM residues within contact range of ligand are explicitly shown.

## Supplementary Fig.6

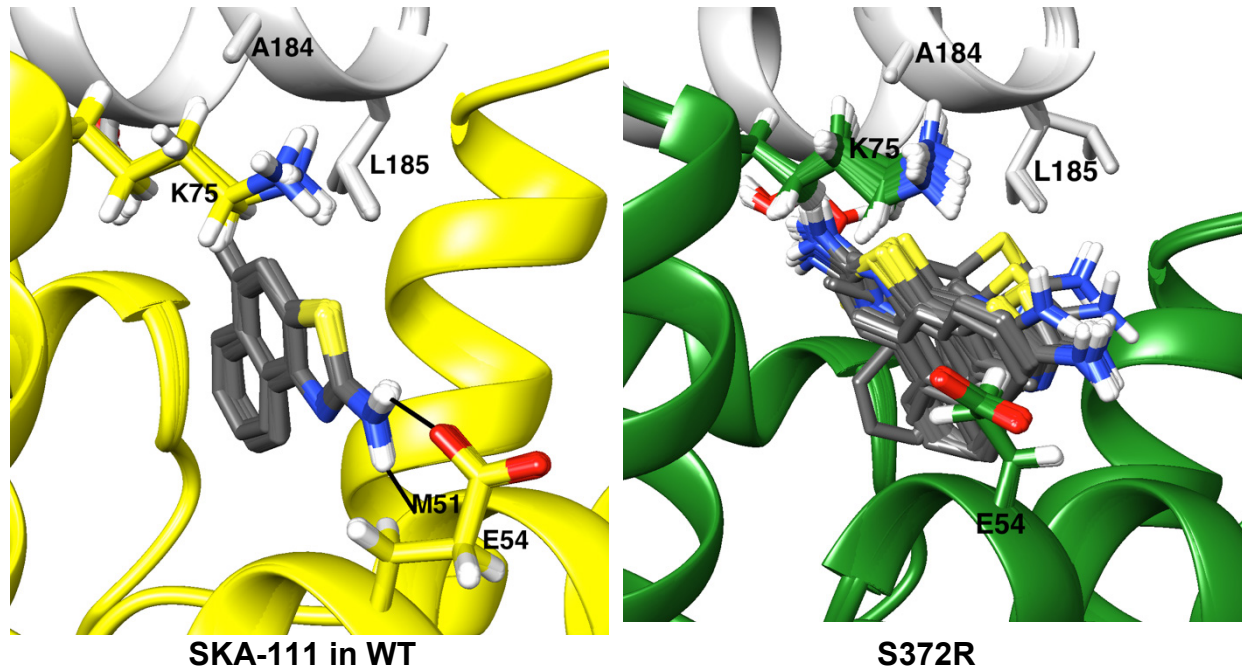

Rosetta ligand docking models of the top 50 lowest energy-binding poses of SKA-111 in the interface between the CaM N-lobe (yellow: WT, green: S372R) and the S<sub>45</sub>A helix (light gray) of wild type KCa<sub>3.1</sub> and the S372R KCa<sub>3.1</sub> mutant. Molecular docking shows that SKA-111 converged well in wild type KCa<sub>3.1</sub> but not in the S372R KCa<sub>3.1</sub> mutant channel.
